# Supplementary material for: Methane oxidizing seawater microbial communities from an Arctic shelf
Source: Copernicus journal article supplement (doi:10.5194/bg-2017-410), 2017-10-13
Supplement: Supplementary file 1 [file bg-2017-410-supplement.pdf]

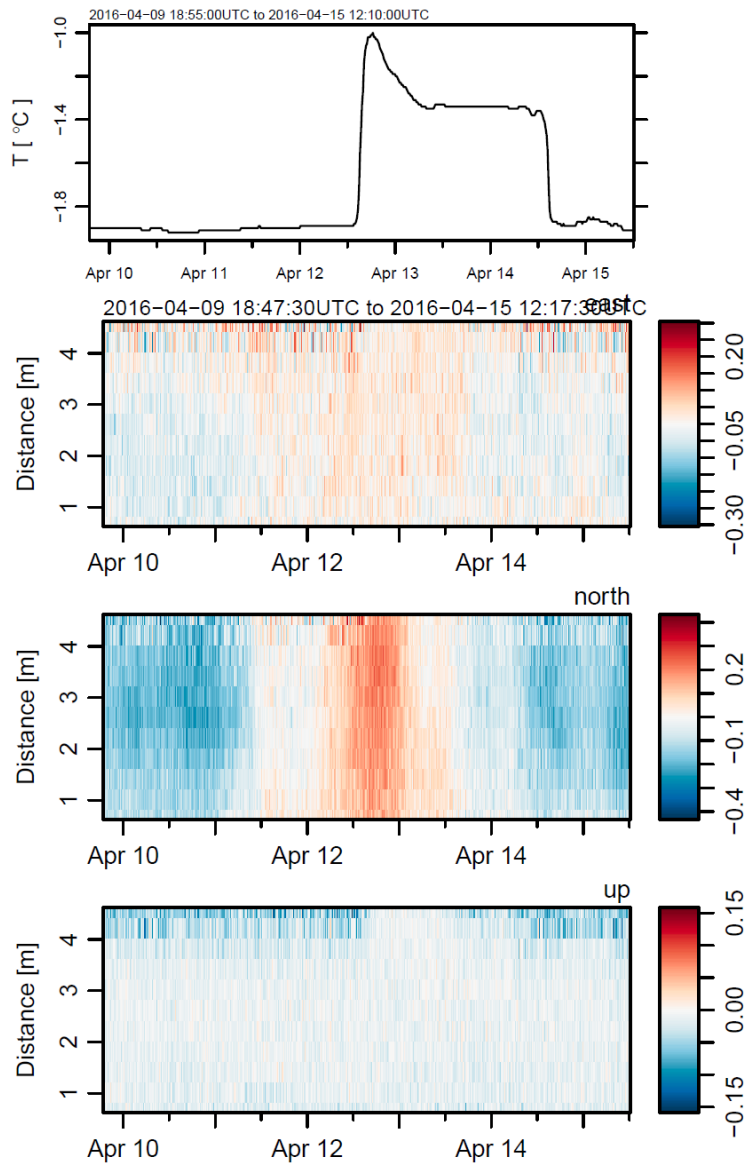

**Supplementary Figure 1:** ADCP data (Aquadopp Profiler, Nortek AS, Norway) between April 9 and 15 April at site IMB

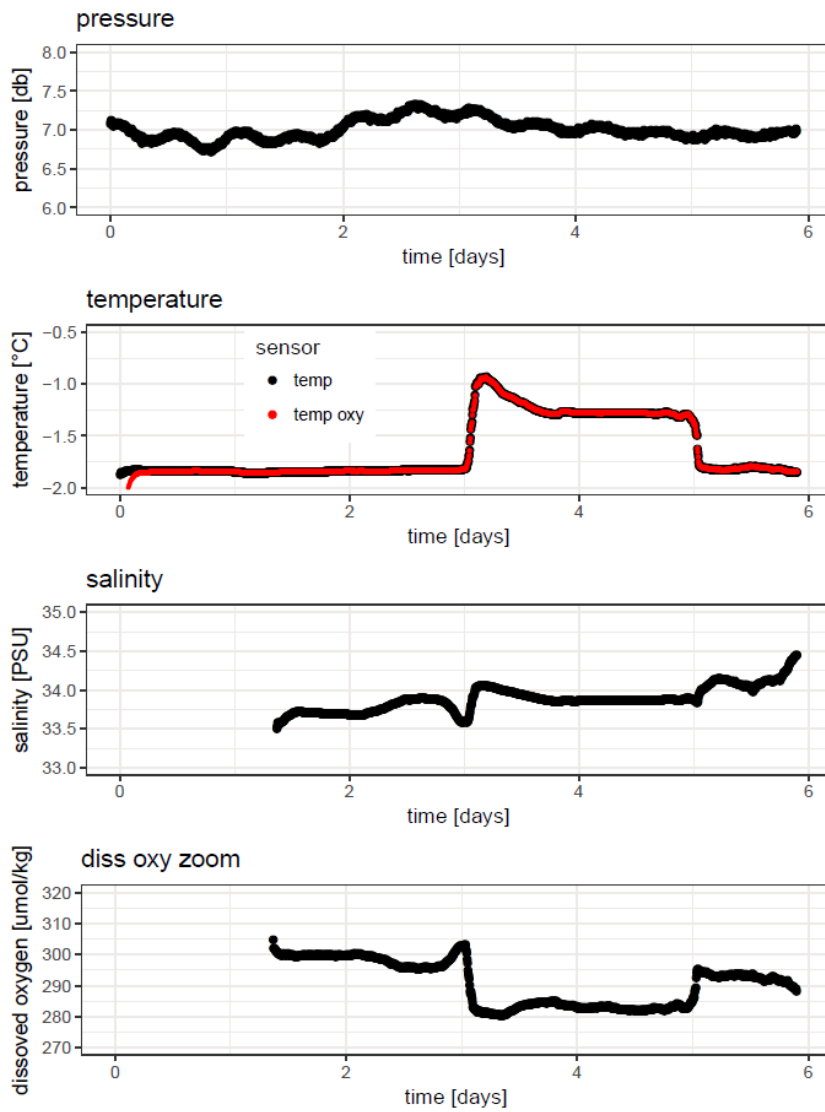

**Supplementary Figure 2:** SBE37 data (SBE37SMP, Sea-Bird Scientific, Washington, USA) between April 9 and 15 April at site IMB

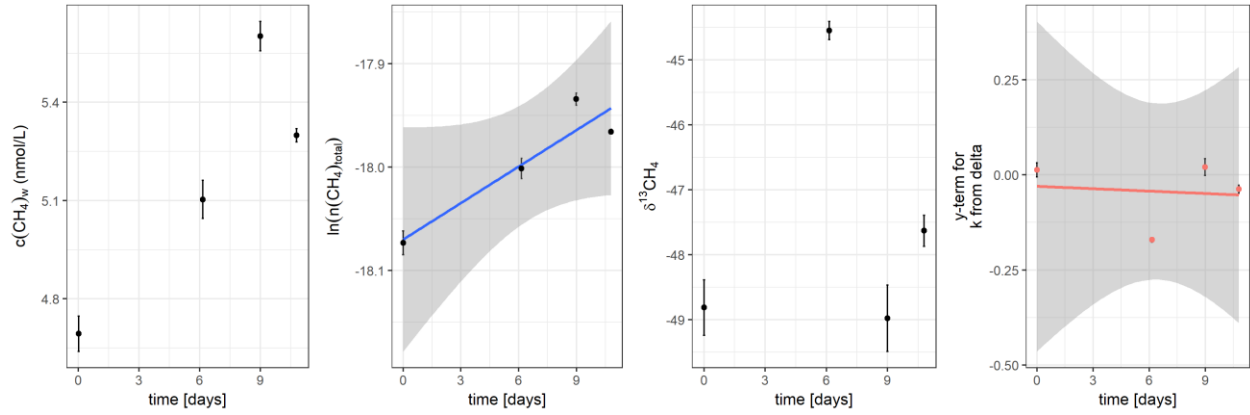

**Supplementary Figure 3:** Example of 0.2x incubation experiment. Error bars show standard deviation on duplicate measurement. Gray shaded area indicates the 95% confidence interval of the linear model.

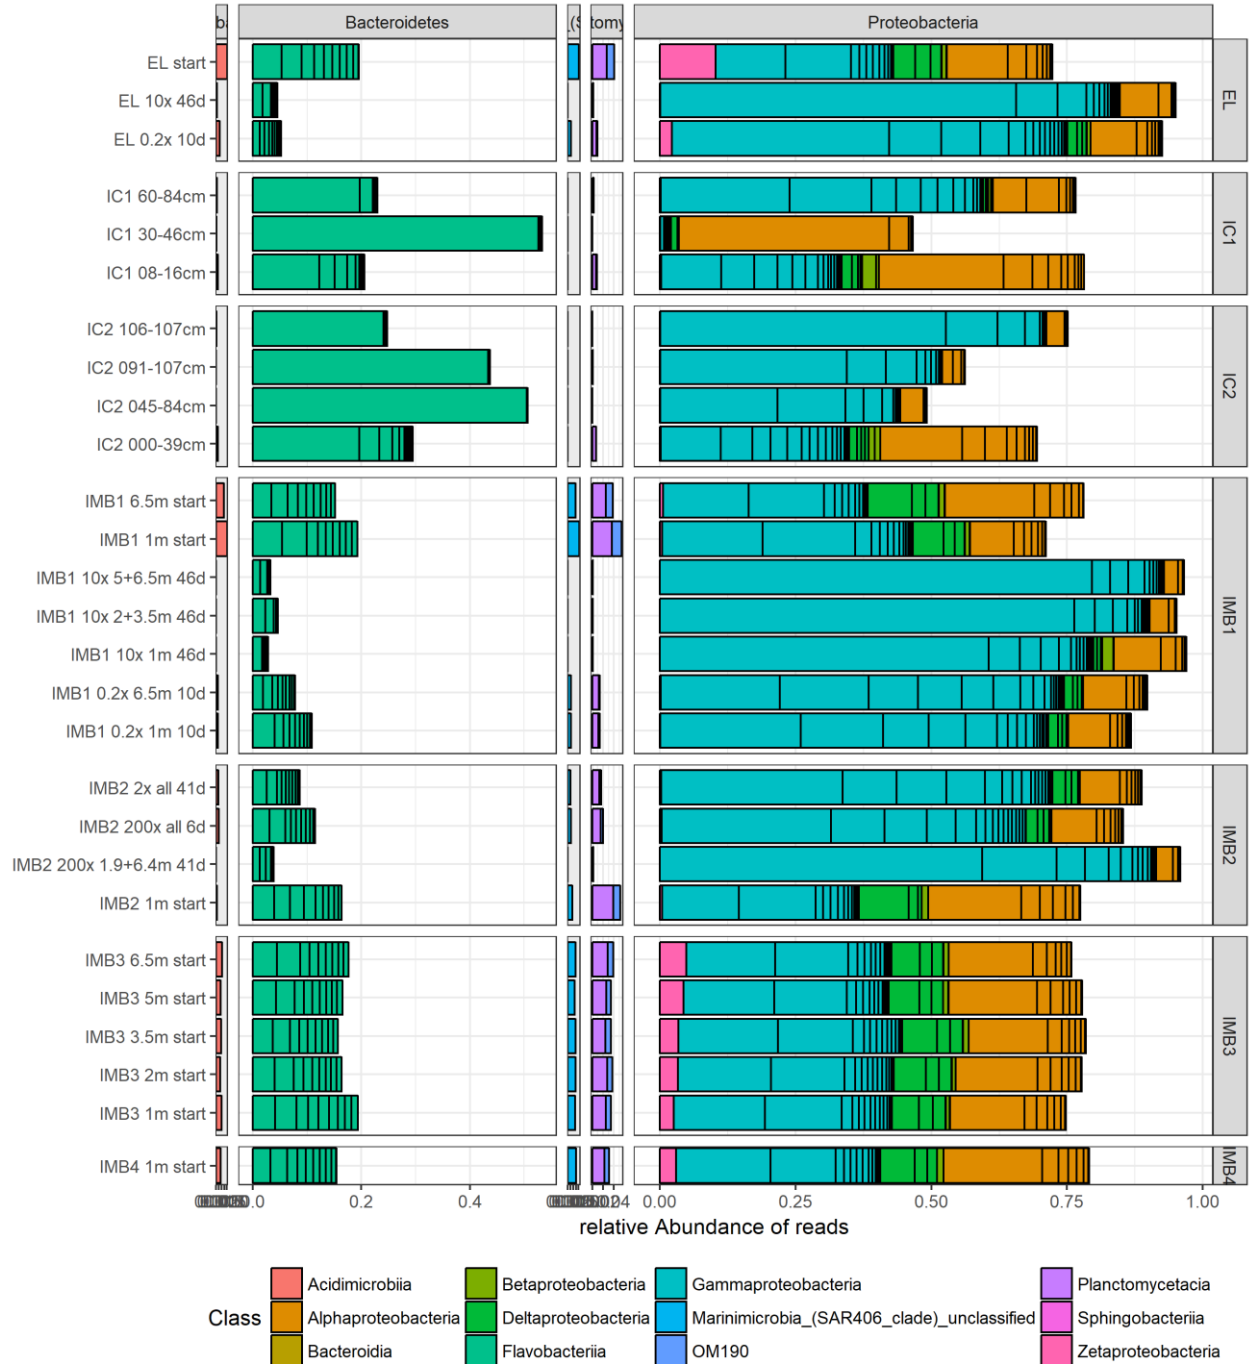

**Supplementary Figure 4:** Relative abundances of phylogenetic groups of the top 50 OTUs. The graph is subset for each sampling site or experiment in vertical direction and for the different phyla in horizontal direction; panels from left to right: Actinobacteria, Bacteroidetes, Marinimicrobia\_SAR406, Planctomycetes, Proteobacteria. Not-normalized data was used to calculate relative abundances. X-axis scaling is identical for all panels. *Note: IC1 30-46cm had sediment layer, IC2 106-107cm was biomass/algae rich bottom.*

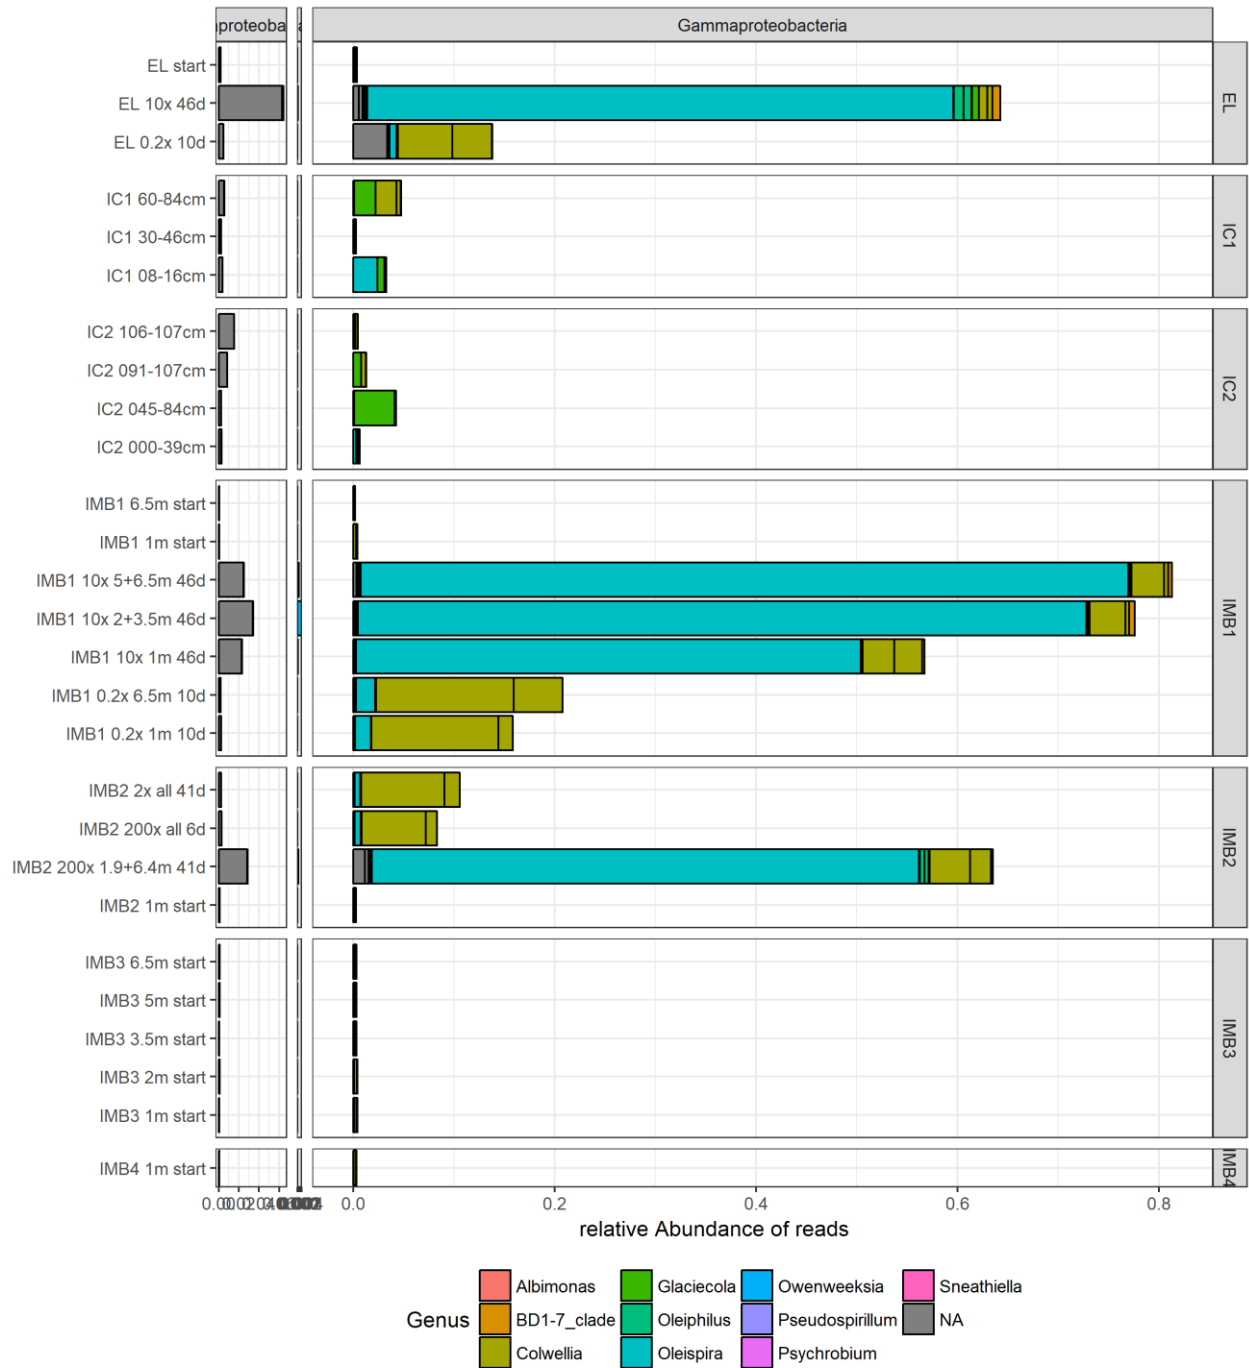

**Supplementary Figure 5:** Relative abundances of differentially more abundant OTUs. The graph is subset for each sampling site or experiment in vertical direction, and for the different phylogenetic classes in horizontal direction; panels from left to right: Alphaproteobacteria, Flavobacteriia < 4%, Gammaproteobacteria. X-axis scaling is identical for all panels. Not-normalized data was used to calculate relative abundances.

**Supplementary Table 1:** Sequencing statistics

|                                                | V4V5                   | pmoA                |
|------------------------------------------------|------------------------|---------------------|
| Number of samples                              | 27                     | 15                  |
| Number of sequences after quality control      | 1,810,329              | 375,448             |
| Number of unique sequences                     | 158,540                | 2,776               |
| Number of OTUs without rare ( $n \leq 2$ )     | 8,877 (97% similarity) | 59 (93% similarity) |
| Mean length of analyzed amplicon in base pairs | 407                    | 219                 |

**Supplementary Table 2:** Relative sequence read abundances of microbial groups atypical for sea ice and found in an anoxic Antarctic ice core (Eronen-Rasimus et al., 2017) :

| class                 | genus            | IC1                                           | IC2                                           |
|-----------------------|------------------|-----------------------------------------------|-----------------------------------------------|
|                       |                  | mean $\pm$ standard deviation                 | mean $\pm$ standard deviation                 |
| Deltaproteobacteria   | Desulforhopalus  | 0                                             | 0                                             |
| Deltaproteobacteria   | Desulfofrigus    | $6.39 \times 10^{-5} \pm 7.33 \times 10^{-5}$ | $3.92 \times 10^{-5} \pm 5.38 \times 10^{-5}$ |
| Epsilonproteobacteria | Sulfurospirillum | $6.92 \times 10^{-6} \pm 1.20 \times 10^{-5}$ | 0                                             |
| Epsilonproteobacteria | Arcobacter       | $4.88 \times 10^{-4} \pm 4.81 \times 10^{-4}$ | $4.80 \times 10^{-4} \pm 2.97 \times 10^{-4}$ |
| Bacteroidia           | Marinifilum      | $2.13 \times 10^{-4} \pm 1.51 \times 10^{-4}$ | $1.14 \times 10^{-4} \pm 2.28 \times 10^{-4}$ |

**References:**

Eronen-Rasimus, E., Luhtanen, A.-M., Rintala, J.-M., Delille, B., Dieckmann, G., Karkman, A. and Tison, J.-L.: An active bacterial community linked to high chl-a concentrations in Antarctic winter-pack ice and evidence for the development of an anaerobic sea-ice bacterial community, ISME J., doi:10.1038/ismej.2017.96, 2017.
